# Supplementary material for: Evolutionary Diversity of Dus2 Enzymes Reveals Novel Structural and Functional Features among Members of the RNA Dihydrouridine Synthases Family
Source: Biomolecules. 2022 Nov 26;12(12):1760. doi: 10.3390/biom12121760 (PMC9775027; doi:10.3390/biom12121760)
Supplement: Supplementary file 1 [file biomolecules-12-01760-s001.zip › table_s1.xlsx]

## Sheet: legend
Data Table S1. Data Table S1. Dus Family Subgoups, Absence-Presence Derived from OrthoInspector Queries using Representative Sequences (see methods). Tax identifiers have been assigned based on their respective UniProt records. A column holding the specific organism’s name is included and precedes the count data for each Dus subfamily, each of which possesses its own column.

## Sheet: dtS1
Taxonomy	TaxID	Organism Name	Dus1	Dus2	Dus3	Dus4	DusA	DusB	DusC	arcDus
Amoebozoa	1257118	Acanthamoeba castellanii str. Neff	5	0	1	0	1	0	0	0
Amoebozoa	44689	Dictyostelium discoideum	1	1	1	1	1	0	0	0
Amoebozoa	5759	Entamoeba histolytica	1	1	1	0	0	0	0	0
Archaeplastida	13333	Amborella trichopoda	1	1	1	0	1	0	0	0
Archaeplastida	3702	Arabidopsis thaliana	1	1	1	0	1	0	0	0
Archaeplastida	15368	Brachypodium distachyon	1	1	1	0	1	0	0	0
Archaeplastida	3055	Chlamydomonas reinhardtii	1	1	1	0	0	1	1	0
Archaeplastida	554065	Chlorella variabilis	1	0	2	0	1	0	0	0
Archaeplastida	280699	Cyanidioschyzon merolae (strain 10D)	1	0	0	0	1	0	0	0
Archaeplastida	79200	Daucus carota subsp. sativus	1	1	1	0	1	0	0	0
Archaeplastida	130081	Galdieria sulphuraria	1	1	1	0	1	0	0	0
Archaeplastida	3847	Glycine max	2	2	1	0	2	0	0	0
Archaeplastida	1480153	Marchantia polymorpha subsp. polymorpha	1	0	1	0	1	0	0	0
Archaeplastida	214687	Musa acuminata subsp. malaccensis	1	1	1	0	1	0	0	0
Archaeplastida	39947	Oryza sativa subsp. japonica	1	1	1	0	1	0	0	0
Archaeplastida	70448	Ostreococcus tauri	1	1	3	0	1	0	0	0
Archaeplastida	3218	Physcomitrella patens subsp. patens	2	2	1	0	2	0	0	0
Archaeplastida	88036	Selaginella moellendorffii	1	1	2	0	1	0	0	0
Archaeplastida	4113	Solanum tuberosum	2	1	1	0	1	0	0	0
Archaeplastida	3562	Spinacia oleracea	1	1	1	0	1	0	0	0
Archaeplastida	29760	Vitis vinifera	1	1	1	0	0	0	0	0
Archaeplastida	4577	Zea mays	1	1	1	0	1	0	0	0
Archaeplastida	29655	Zostera marina	1	1	1	0	1	0	0	0
Asgard group	1706444	Candidatus Thorarchaeota archaeon SMTZ1-45	0	0	0	0	0	0	0	0
Asgard group	1538547	Lokiarchaeum sp. GC14_75	0	0	0	0	0	0	0	0
DPANN	2268188	Candidatus Nanopusillus sp. Nst1	0	0	0	0	0	0	0	0
DPANN	228908	Nanoarchaeum equitans (strain Kin4-M)	0	0	0	0	0	0	0	0
Euryarchaeota	439481	Aciduliprofundum boonei (strain DSM 19572 / T469)	0	0	0	0	0	0	0	0
Euryarchaeota	224325	Archaeoglobus fulgidus (strain ATCC 49558 / VC-16 / DSM 4304 / JCM 9628 / NBRC 100126)	0	0	0	0	0	0	0	1
Euryarchaeota	1295009	Candidatus Methanomassiliicoccus intestinalis Issoire-Mx1	0	0	0	0	0	0	0	0
Euryarchaeota	1776333	Hadesarchaea archaeon YNP_45	0	0	0	0	0	0	0	0
Euryarchaeota	272569	Haloarcula marismortui (strain ATCC 43049 / DSM 3752 / JCM 8966 / VKM B-1809)	0	0	0	0	0	0	0	1
Euryarchaeota	64091	Halobacterium salinarum (strain ATCC 700922 / JCM 11081 / NRC-1)	0	0	0	0	0	0	0	1
Euryarchaeota	2246	Haloferax volcanii (strain ATCC 29605 / DSM 3757 / JCM 8879 / NBRC 14742 / NCIMB 2012 / VKM B-1768 / DS2)	0	0	0	0	0	0	0	1
Euryarchaeota	243232	Methanocaldococcus jannaschii (strain ATCC 43067 / DSM 2661 / JAL-1 / JCM 10045 / NBRC 100440)	0	0	0	0	0	0	0	0
Euryarchaeota	351160	Methanocella arvoryzae (strain DSM 22066 / NBRC 105507 / MRE50)	0	0	0	0	0	0	0	0
Euryarchaeota	190192	Methanopyrus kandleri (strain AV19 / DSM 6324 / JCM 9639 / NBRC 100938)	0	0	0	0	0	0	0	1
Euryarchaeota	188937	Methanosarcina acetivorans (strain ATCC 35395 / DSM 2834 / JCM 12185 / C2A)	0	0	0	0	0	1	0	0
Euryarchaeota	323259	Methanospirillum hungatei JF-1 (strain ATCC 27890 / DSM 864 / NBRC 100397 / JF-1)	0	0	0	0	0	0	0	0
Euryarchaeota	145262	Methanothermobacter thermautotrophicus (strain ATCC 29096 / DSM 1053 / JCM 10044 / NBRC 100330 / Delta H)	0	0	0	0	0	0	0	1
Euryarchaeota	13769	Natrialba magadii (strain ATCC 43099 / DSM 3394 / CIP 104546 / JCM 8861/ NBRC 102185 / NCIMB 2190 / MS3)	0	0	0	0	0	0	0	1
Euryarchaeota	263820	Picrophilus torridus (strain ATCC 700027 / DSM 9790 / JCM 10055 / NBRC 100828)	0	0	0	0	0	0	0	0
Euryarchaeota	272844	Pyrococcus abyssi (strain GE5 / Orsay)	0	0	0	0	0	0	0	0
Euryarchaeota	69014	Thermococcus kodakarensis (strain ATCC BAA-918 / JCM 12380 / KOD1)	0	0	0	0	0	0	0	0
Excavata	1257118	Acanthamoeba castellanii str. Neff	5	0	1	0	1	0	0	0
Excavata	75058	Bodo saltans	1	0	1	1	0	0	0	0
Excavata	44689	Dictyostelium discoideum	1	1	1	1	1	0	0	0
Excavata	5759	Entamoeba histolytica	1	1	1	0	0	0	0	0
Excavata	598745	Giardia intestinalis	1	0	1	0	0	0	0	0
Excavata	5664	Leishmania major	1	1	1	1	0	0	0	0
Excavata	5762	Naegleria gruberi	1	1	0	1	0	0	0	0
Excavata	1314962	Perkinsela sp. CCAP 1560/4	1	1	0	0	0	0	0	0
Excavata	5722	Trichomonas vaginalis	2	2	0	0	0	1	0	0
Excavata	353153	Trypanosoma cruzi (strain CL Brener)	1	1	1	1	0	0	0	0
FCB group	818	Bacteroides thetaiotaomicron (strain ATCC 29148 / DSM 2079 / NCTC 10582 / E50 / VPI-5482)	0	0	0	0	0	1	0	0
FCB group	79329	Chitinophaga pinensis (strain ATCC 43595 / DSM 2588 / NCIB 11800 / UQM 2034)	0	0	0	0	0	2	0	0
FCB group	319225	Chlorobium luteolum (strain DSM 273 / 2530)	0	0	0	0	0	1	0	0
FCB group	269798	Cytophaga hutchinsonii (strain ATCC 33406 / NCIMB 9469)	0	0	0	0	0	1	0	0
FCB group	59374	Fibrobacter succinogenes (strain ATCC 19169 / S85)	0	0	1	0	1	0	0	0
FCB group	376686	Flavobacterium johnsoniae (strain ATCC 17061 / DSM 2064 / UW101)	0	0	0	0	0	1	0	0
FCB group	379066	Gemmatimonas aurantiaca (strain T-27 / DSM 14586 / JCM 11422 / NBRC 100505)	0	0	0	0	0	1	0	0
FCB group	1191523	Melioribacter roseus (strain JCM 17771 / P3M-2)	0	0	0	0	0	1	0	0
FCB group	485917	Pedobacter heparinus (strain ATCC 13125 / DSM 2366 / CIP 104194 / JCM 7457 / NBRC 12017 / NCIMB 9290 / NRRL B-14731 / HIM 762-3)	0	0	0	0	0	1	0	0
FCB group	309807	Salinibacter ruber (strain DSM 13855 / M31)	0	0	0	0	0	1	0	0
FCB group	444179	Sulcia muelleri (strain GWSS)	0	0	0	0	0	0	0	0
Opisthokonta	107806	Acyrthosiphon pisum	1	1	1	1	0	0	0	0
Opisthokonta	8496	Alligator mississippiensis	1	1	1	1	0	0	0	0
Opisthokonta	578462	Allomyces macrogynus ATCC 38327	2	2	2	2	0	0	0	0
Opisthokonta	72036	Amphimedon queenslandica	1	1	1	1	0	1	0	0
Opisthokonta	28377	Anolis carolinensis	1	1	1	1	0	0	0	0
Opisthokonta	7165	Anopheles gambiae	1	1	1	1	0	0	0	0
Opisthokonta	2813651	Arthrobotrys oligospora (strain ATCC 24927 / CBS 115.81 / DSM 1491)	1	1	1	0	0	0	0	0
Opisthokonta	6253	Ascaris suum	0	0	1	1	0	0	0	0
Opisthokonta	223369	Astyanax mexicanus	1	1	1	1	0	0	0	0
Opisthokonta	1043005	Aureobasidium subglaciale EXF-2481	1	1	1	1	0	0	0	0
Opisthokonta	403673	Batrachochytrium dendrobatidis JEL423	1	1	1	1	0	0	0	0
Opisthokonta	7091	Bombyx mori	1	1	1	1	0	0	0	0
Opisthokonta	9913	Bos taurus	1	1	1	1	0	0	0	0
Opisthokonta	7739	Branchiostoma floridae	1	1	1	1	0	0	0	0
Opisthokonta	6279	Brugia malayi	1	2	1	1	0	0	0	0
Opisthokonta	6239	Caenorhabditis elegans	1	1	1	1	0	0	0	0
Opisthokonta	1330018	Calocera viscosa TUFC12733	1	1	1	1	0	0	0	0
Opisthokonta	237561	Candida albicans (strain SC5314 / ATCC MYA-2876)	1	1	2	1	0	0	0	0
Opisthokonta	9615	Canis lupus familiaris	1	1	1	1	0	0	0	0
Opisthokonta	595528	Capsaspora owczarzaki (strain ATCC 30864)	1	1	1	1	0	0	0	0
Opisthokonta	8469	Chelonia mydas	1	1	1	0	0	0	0	0
Opisthokonta	7719	Ciona intestinalis	1	0	1	1	0	0	0	0
Opisthokonta	240176	Coprinopsis cinerea (strain Okayama-7 / 130 / ATCC MYA-4618 / FGSC 9003)	1	1	1	0	0	0	0	0
Opisthokonta	29159	Crassostrea gigas	1	1	1	1	0	0	0	0
Opisthokonta	214684	Cryptococcus neoformans var. neoformans serotype D (strain JEC21 / ATCC MYA-565)	1	1	1	1	0	0	0	0
Opisthokonta	7955	Danio rerio	1	1	1	1	0	0	0	0
Opisthokonta	6669	Daphnia pulex	1	1	1	1	0	0	0	0
Opisthokonta	7227	Drosophila melanogaster	1	1	1	1	0	0	0	0
Opisthokonta	6210	Echinococcus granulosus	1	1	0	1	0	0	0	0
Opisthokonta	284813	Encephalitozoon cuniculi (strain GB-M1)	1	0	0	0	1	0	0	0
Opisthokonta	1287681	Eutypa lata (strain UCR-EL1)	1	1	1	1	0	0	0	0
Opisthokonta	212818	Exophiala mesophila	1	1	1	0	0	0	0	0
Opisthokonta	691883	Fonticula alba	1	2	0	1	0	0	0	0
Opisthokonta	51543	Gallus gallus	0	1	1	1	0	0	0	0
Opisthokonta	229533	Gibberella zeae (strain PH-1 / ATCC MYA-4620 / FGSC 9075 / NRRL 31084)	1	1	1	1	0	0	0	0
Opisthokonta	1344416	Gonapodya prolifera JEL478	1	1	1	1	0	0	0	0
Opisthokonta	6412	Helobdella robusta	1	1	0	1	0	0	0	0
Opisthokonta	9606	Homo sapiens	1	1	1	1	0	0	0	0
Opisthokonta	85433	Hymenolepis microstoma	1	1	0	0	0	0	0	0
Opisthokonta	6945	Ixodes scapularis	1	1	1	1	0	0	0	0
Opisthokonta	7897	Latimeria chalumnae	1	1	1	1	0	0	0	0
Opisthokonta	7918	Lepisosteus oculatus	1	1	1	1	0	0	0	0
Opisthokonta	225164	Lottia gigantea	1	1	1	1	0	0	0	0
Opisthokonta	425265	Malassezia globosa (strain ATCC MYA-4612 / CBS 7966)	1	1	1	1	0	0	0	0
Opisthokonta	683840	Microbotryum lychnidis-dioicae (strain p1A1 Lamole / MvSl-1064)	1	1	1	1	0	0	0	0
Opisthokonta	764103	Mixia osmundae (strain CBS 9802 / IAM 14324 / JCM 22182 / KY 12970)	1	1	1	1	0	0	0	0
Opisthokonta	13616	Monodelphis domestica	1	1	1	1	0	0	0	0
Opisthokonta	81824	Monosiga brevicollis	1	1	1	1	0	0	0	0
Opisthokonta	10090	Mus musculus	1	1	1	1	0	0	0	0
Opisthokonta	72036	Nasonia vitripennis	0	1	1	1	0	0	0	0
Opisthokonta	45351	Nematostella vectensis	1	1	1	1	0	0	0	0
Opisthokonta	330879	Neosartorya fumigata (strain ATCC MYA-4609 / Af293 / CBS 101355 / FGSC A1100)	1	1	1	0	0	0	0	0
Opisthokonta	367110	Neurospora crassa (strain ATCC 24698 / 74-OR23-1A / CBS 708.71 / DSM 1257 / FGSC 987)	1	1	1	1	0	0	0	0
Opisthokonta	578460	Nosema ceranae (strain BRL01)	1	0	0	0	1	0	0	0
Opisthokonta	34765	Oikopleura dioica	1	3	1	1	0	0	0	0
Opisthokonta	72036	Oreochromis niloticus	1	1	1	1	0	0	0	0
Opisthokonta	9598	Pan troglodytes	1	1	1	1	0	0	0	0
Opisthokonta	121224	Pediculus humanus subsp. corporis	1	1	2	1	0	0	0	0
Opisthokonta	321614	Phaeosphaeria nodorum (strain SN15 / ATCC MYA-4574 / FGSC 10173)	1	1	1	0	0	0	0	0
Opisthokonta	1408658	Pneumocystis carinii B80	1	1	1	0	0	0	0	0
Opisthokonta	418459	Puccinia graminis f. sp. tritici (strain CRL 75-36-700-3 / race SCCL)	1	1	0	1	0	0	0	0
Opisthokonta	10116	Rattus norvegicus	1	1	1	1	0	0	0	0
Opisthokonta	1432141	Rhizophagus irregularis DAOM 197198w	1	1	1	1	0	0	0	0
Opisthokonta	4847	Rhizopus microsporus	1	2	1	1	1	0	0	0
Opisthokonta	988480	Rozella allomycis CSF55	1	1	1	1	0	0	0	0
Opisthokonta	559292	Saccharomyces cerevisiae (strain ATCC 204508 / S288c)	1	1	1	1	0	0	0	0
Opisthokonta	698492	Saitoella complicata NRRL Y-17804	1	1	1	1	0	0	0	0
Opisthokonta	946362	Salpingoeca rosetta (strain ATCC 50818 / BSB-021)	1	1	1	1	0	0	0	0
Opisthokonta	6183	Schistosoma mansoni	1	1	0	1	0	0	0	0
Opisthokonta	284812	Schizosaccharomyces pombe (strain 972 / ATCC 24843)	1	1	1	1	0	0	0	0
Opisthokonta	113540	Scleropages formosus	1	1	1	1	0	0	0	0
Opisthokonta	1432307	Sclerotinia borealis F-4157	1	1	1	1	0	0	0	0
Opisthokonta	645134	Spizellomyces punctatus DAOM BR117	1	1	1	1	0	0	0	0
Opisthokonta	126957	Strigamia maritima	1	1	1	1	0	0	0	0
Opisthokonta	7668	Strongylocentrotus purpuratus	1	1	1	1	0	0	0	0
Opisthokonta	1097556	Taphrina deformans (strain PYCC 5710 / ATCC 11124 / CBS 356.35 / IMI 108563 / JCM 9778 / NBRC 8474)	1	0	1	1	0	0	0	0
Opisthokonta	34305	Tetranychus urticae	1	1	1	0	0	0	0	0
Opisthokonta	669202	Thelohanellus kitauei	1	1	1	1	0	0	0	0
Opisthokonta	1037660	Tilletiaria anomala UBC 951	1	1	1	1	0	0	0	0
Opisthokonta	7070	Tribolium castaneum	1	1	1	1	0	0	0	0
Opisthokonta	6334	Trichinella spiralis	1	1	1	1	0	0	0	0
Opisthokonta	10228	Trichoplax adhaerens	1	1	1	1	0	0	0	0
Opisthokonta	656061	Tuber melanosporum (strain Mel28)	1	1	1	1	0	0	0	0
Opisthokonta	237631	Ustilago maydis (strain 521 / FGSC 9021)	1	1	1	1	0	0	0	0
Opisthokonta	948595	Vavraia culicis (isolate floridensis)	1	0	0	0	1	0	0	0
Opisthokonta	1299270	Wallemia ichthyophaga (strain EXF-994 / CBS 113033)	1	1	0	1	0	0	0	0
Opisthokonta	8364	Xenopus tropicalis	0	1	2	1	0	0	0	0
Opisthokonta	1328760	Xylona heveae TC161	1	1	1	1	0	0	0	0
Opisthokonta	284591	Yarrowia lipolytica (strain CLIB 122 / E 150)	1	1	1	1	0	0	0	0
Opisthokonta	136037	Zootermopsis nevadensis	1	0	1	1	0	0	0	0
Other bacteria	224324	Aquifex aeolicus (strain VF5)	0	0	0	0	0	1	0	0
Other bacteria	224326	Borrelia burgdorferi (strain ATCC 35210 / B31 / CIP 102532 / DSM 4680)	0	0	0	0	1	0	0	0
Other bacteria	565034	Brachyspira hyodysenteriae (strain ATCC 49526 / WA1)	0	0	0	0	1	0	0	0
Other bacteria	693075	Caldisericum exile (strain DSM 21853 / NBRC 104410 / AZM16c01)	0	0	1	0	0	0	0	0
Other bacteria	981222	Chloracidobacterium thermophilum (strain B)	0	0	0	0	0	0	1	0
Other bacteria	639282	Deferribacter desulfuricans (strain DSM 14783 / JCM 11476 / NBRC 101012 / SSM1)	0	0	0	0	0	1	0	0
Other bacteria	1006576	Defluviitoga tunisiensis	0	0	0	0	0	1	0	0
Other bacteria	653733	Desulfurispirillum indicum (strain ATCC BAA-1389 / S5)	0	0	0	0	0	0	1	0
Other bacteria	868864	Desulfurobacterium thermolithotrophum (strain DSM 11699 / BSA)	0	0	0	0	0	1	0	0
Other bacteria	515635	Dictyoglomus turgidum (strain Z-1310 / DSM 6724)	0	0	0	0	0	0	0	0
Other bacteria	445932	Elusimicrobium minutum (strain Pei191)	0	0	0	0	0	1	0	0
Other bacteria	190304	Fusobacterium nucleatum subsp. nucleatum (strain ATCC 25586 / CIP 101130 / JCM 8532 / LMG 13131)	0	0	0	0	0	1	0	0
Other bacteria	204669	Koribacter versatilis (strain Ellin345)	0	0	0	0	0	1	0	0
Other bacteria	521045	Kosmotoga olearia (strain TBF 19.5.1)	0	0	0	0	0	1	0	0
Other bacteria	189518	Leptospira interrogans serogroup Icterohaemorrhagiae serovar Lai (strain 56601)	0	0	0	0	1	1	0	0
Other bacteria	234267	Solibacter usitatus (strain Ellin6076)	0	0	0	0	0	1	0	0
Other bacteria	525903	Thermanaerovibrio acidaminovorans (strain ATCC 49978 / DSM 6589 / Su883)	0	0	0	0	0	0	1	0
Other bacteria	667014	Thermodesulfatator indicus (strain DSM 15286 / JCM 11887 / CIR29812)	0	0	0	0	0	0	2	0
Other bacteria	289376	Thermodesulfovibrio yellowstonii (strain ATCC 51303 / DSM 11347 / YP87)	0	0	0	0	0	0	0	0
Other bacteria	243274	Thermotoga maritima (strain ATCC 43589 / MSB8 / DSM 3109 / JCM 10099)	0	0	0	0	0	1	0	0
Other bacteria	243276	Treponema pallidum (strain Nichols)	0	0	0	0	0	1	0	0
Other Eukaryota	1460289	Chrysochromulina sp. CCMP291	1	1	1	0	1	0	0	0
Other Eukaryota	2903	Emiliania huxleyi	3	1	1	0	1	0	0	0
Other Eukaryota	905079	Guillardia theta CCMP2712	5	1	1	1	1	0	0	0
Other Eukaryota	461836	Thecamonas trahens ATCC 50062	1	1	1	1	0	0	0	0
Proteobacteria	176299	Agrobacterium fabrum (strain C58 / ATCC 33970)	0	0	0	0	1	1	0	0
Proteobacteria	264462	Bdellovibrio bacteriovorus (strain ATCC 15356 / DSM 50701 / NCIB 9529 / HD100)	0	0	0	0	0	1	1	0
Proteobacteria	257313	Bordetella pertussis (strain Tohama I / ATCC BAA-589 / NCTC 13251)	0	0	0	0	1	1	0	0
Proteobacteria	224911	Bradyrhizobium diazoefficiens (strain JCM 10833 / IAM 13628 / NBRC 14792 / USDA 110)	0	0	0	0	1	0	1	0
Proteobacteria	107806	Buchnera aphidicola subsp. Acyrthosiphon pisum (strain APS)	0	0	0	0	0	0	0	0
Proteobacteria	1208921	Candidatus Kinetoplastibacterium galatii TCC219	0	0	0	0	1	0	0	0
Proteobacteria	190650	Caulobacter crescentus (strain ATCC 19089 / CB15)	0	0	0	0	1	1	0	0
Proteobacteria	290398	Chromohalobacter salexigens (strain DSM 3043 / ATCC BAA-138 / NCIMB 13768)	0	0	0	0	1	1	1	0
Proteobacteria	159087	Dechloromonas aromatica (strain RCB)	0	0	0	0	0	1	1	0
Proteobacteria	644282	Desulfarculus baarsii (strain ATCC 33931 / DSM 2075 / VKM B-1802 / 2st14)	0	0	0	0	0	0	1	0
Proteobacteria	96561	Desulfococcus oleovorans (strain DSM 6200 / Hxd3)	0	0	0	0	0	1	0	0
Proteobacteria	207559	Desulfovibrio alaskensis (strain G20)	0	0	0	0	0	0	1	0
Proteobacteria	246195	Dichelobacter nodosus (strain VCS1703A)	0	0	0	0	1	1	0	0
Proteobacteria	83333	Escherichia coli (strain K12)	0	0	0	0	1	1	1	0
Proteobacteria	1356299	Ferrovum sp. JA12	0	0	0	0	0	1	0	0
Proteobacteria	1267021	Frischella perrara	0	0	0	0	1	1	1	0
Proteobacteria	395494	Gallionella capsiferriformans (strain ES-2)	0	0	0	0	0	1	1	0
Proteobacteria	243231	Geobacter sulfurreducens (strain ATCC 51573 / DSM 12127 / PCA)	0	0	0	0	0	1	0	0
Proteobacteria	71421	Haemophilus influenzae (strain ATCC 51907 / DSM 11121 / KW20 / Rd)	0	0	0	0	1	1	1	0
Proteobacteria	85962	Helicobacter pylori (strain ATCC 700392 / 26695)	1	0	0	0	0	0	0	0
Proteobacteria	760142	Hippea maritima (strain ATCC 700847 / DSM 10411 / MH2)	1	0	0	0	0	0	0	0
Proteobacteria	272624	Legionella pneumophila subsp. pneumophila (strain Philadelphia 1 / ATCC 33152 / DSM 7513)	0	0	0	0	1	0	1	0
Proteobacteria	156889	Magnetococcus marinus (strain ATCC BAA-1437 / JCM 17883 / MC-1)	0	0	0	0	0	1	0	0
Proteobacteria	314345	Mariprofundus ferrooxydans PV-1	0	0	0	0	0	1	0	0
Proteobacteria	265072	Methylobacillus flagellatus (strain KT / ATCC 51484 / DSM 6875)	0	0	0	0	0	1	0	0
Proteobacteria	243233	Methylococcus capsulatus (strain ATCC 33009 / NCIMB 11132 / Bath)	0	0	0	0	1	1	0	0
Proteobacteria	246197	Myxococcus xanthus (strain DK 1622)	0	0	0	0	1	1	0	0
Proteobacteria	122586	Neisseria meningitidis serogroup B (strain MC58)	0	0	1	0	1	1	0	0
Proteobacteria	323261	Nitrosococcus oceani (strain ATCC 19707 / BCRC 17464 / NCIMB 11848 / C-107)	0	0	0	0	1	0	0	0
Proteobacteria	228410	Nitrosomonas europaea (strain ATCC 19718 / CIP 103999 / KCTC 2705 / NBRC 14298)	0	0	0	0	0	1	0	0
Proteobacteria	335992	Pelagibacter ubique (strain HTCC1062)	0	0	0	0	1	0	0	0
Proteobacteria	208964	Pseudomonas aeruginosa (strain ATCC 15692 / DSM 22644 / CIP 104116 / JCM 14847 / LMG 12228 / 1C / PRS 101 / PAO1)	0	0	0	0	1	1	1	0
Proteobacteria	267608	Ralstonia solanacearum (strain GMI1000)	0	0	0	0	1	1	1	0
Proteobacteria	266834	Rhizobium meliloti (strain 1021)	0	0	0	0	1	1	0	0
Proteobacteria	272943	Rhodobacter sphaeroides (strain ATCC 17023 / 2.4.1 / NCIB 8253 / DSM 158)	0	0	0	0	1	1	0	0
Proteobacteria	269796	Rhodospirillum rubrum (strain ATCC 11170 / ATH 1.1.1 / DSM 467 / LMG 4362 / NCIB 8255 / S1)	0	0	0	0	1	1	0	0
Proteobacteria	272947	Rickettsia prowazekii (strain Madrid E)	0	0	0	0	0	1	0	0
Proteobacteria	203122	Saccharophagus degradans (strain 2-40 / ATCC 43961 / DSM 17024)	0	0	0	1	0	1	1	0
Proteobacteria	1304275	Salinisphaera hydrothermalis C41B8	0	0	0	0	1	1	0	0
Proteobacteria	99287	Salmonella typhimurium (strain LT2 / SGSC1412 / ATCC 700720)	0	0	0	0	1	2	0	0
Proteobacteria	211586	Shewanella oneidensis (strain MR-1)	0	0	0	0	1	2	0	0
Proteobacteria	465721	Steroidobacter denitrificans	0	0	0	0	1	1	0	0
Proteobacteria	1163617	Sulfuricella denitrificans skB26	0	0	0	0	0	1	1	0
Proteobacteria	335543	Syntrophobacter fumaroxidans (strain DSM 10017 / MPOB)	0	0	0	0	0	1	0	0
Proteobacteria	292415	Thiobacillus denitrificans (strain ATCC 25259)	0	0	0	0	0	1	0	0
Proteobacteria	317025	Thiomicrospira crunogena (strain XCL-2)	0	0	0	0	1	1	0	0
Proteobacteria	243277	Vibrio cholerae serotype O1 (strain ATCC 39315 / El Tor Inaba N16961)	0	0	0	0	1	1	1	0
Proteobacteria	190485	Xanthomonas campestris pv. campestris (strain ATCC 33913 / DSM 3586 / NCPPB 528 / LMG 568 / P 25)	0	0	0	0	1	1	0	0
Proteobacteria	632	Yersinia pestis	0	0	0	0	1	1	1	0
Proteobacteria	264203	Zymomonas mobilis subsp. mobilis (strain ATCC 31821 / ZM4 / CP4)	0	0	0	0	0	1	0	0
PVC group	349741	Akkermansia muciniphila (strain ATCC BAA-835 / Muc)	0	0	0	0	0	1	0	0
PVC group	272561	Chlamydia trachomatis (strain D/UW-3/Cx)	0	0	1	0	0	0	0	0
PVC group	452637	Opitutus terrae (strain DSM 11246 / JCM 15787 / PB90-1)	0	0	0	0	0	1	0	0
PVC group	530564	Pirellula staleyi (strain ATCC 27377 / DSM 6068 / ICPB 4128)	0	0	0	0	0	2	0	0
PVC group	690879	Terrimicrobium sacchariphilum	0	0	0	0	0	1	0	0
SAR	65357	Albugo candida	12	1	1	0	1	0	0	0
SAR	44056	Aureococcus anophagefferens	1	1	1	0	1	0	0	0
SAR	5865	Babesia bovis	1	0	0	0	1	0	0	0
SAR	12968	Blastocystis hominis	1	1	1	0	1	0	0	0
SAR	1460289	Chrysochromulina sp. CCMP291	1	1	1	0	1	0	0	0
SAR	441375	Cryptosporidium muris (strain RN66)	1	1	1	0	1	0	0	0
SAR	2880	Ectocarpus siliculosus	1	1	1	0	2	0	0	0
SAR	2903	Emiliania huxleyi	3	1	1	0	1	0	0	0
SAR	110365	Gregarina niphandrodes	0	0	1	0	1	0	0	0
SAR	905079	Guillardia theta CCMP2712	5	1	1	1	1	0	0	0
SAR	72520	Nannochloropsis gaditana	1	1	0	0	1	0	0	0
SAR	1172189	Oxytricha trifallax	1	1	0	0	1	0	0	0
SAR	5888	Paramecium tetraurelia	1	0	0	0	1	0	0	0
SAR	556484	Phaeodactylum tricornutum (strain CCAP 1055/1)	1	1	1	0	1	0	0	0
SAR	403677	Phytophthora infestans (strain T30-4)	1	1	1	0	1	0	0	0
SAR	37360	Plasmodiophora brassicae	1	1	0	0	1	0	0	0
SAR	36329	Plasmodium falciparum (isolate 3D7)	1	0	0	0	1	0	0	0
SAR	431595	Pythium ultimum DAOM BR144	1	2	1	0	1	0	0	0
SAR	1156394	Saprolegnia diclina VS20	3	1	1	0	1	0	0	0
SAR	35128	Thalassiosira pseudonana	1	1	1	0	1	0	0	0
SAR	461836	Thecamonas trahens ATCC 50062	1	1	1	1	0	0	0	0
SAR	5874	Theileria parva	1	0	0	0	1	0	0	0
SAR	432359	Toxoplasma gondii (strain ATCC 50861 / VEG)	1	1	1	0	1	0	0	0
SAR	1169540	Vitrella brassicaformis (strain CCMP3155)	2	1	1	0	1	0	0	0
TACK group	666510	Acidilobus saccharovorans (strain DSM 16705 / JCM 18335 / VKM B-2471 / 345-15)	0	0	0	0	0	0	0	0
TACK group	272557	Aeropyrum pernix (strain ATCC 700893 / DSM 11879 / JCM 9820 / NBRC 100138 / K1)	0	0	0	0	0	0	0	0
TACK group	397948	Caldivirga maquilingensis (strain ATCC 700844 / DSM 13496 / JCM 10307 / IC-167)	0	0	0	0	0	0	0	0
TACK group	2041147	Candidatus Bathyarchaeota archaeon B24	0	0	0	0	0	0	0	0
TACK group	311458	Candidatus Caldiarchaeum subterraneum	0	0	0	0	0	0	0	0
TACK group	414004	Cenarchaeum symbiosum (strain A)	0	0	0	0	0	0	0	0
TACK group	1163730	Fervidicoccus fontis (strain DSM 19380 / JCM 18336 / VKM B-2539 / Kam940)	0	0	0	0	0	0	0	0
TACK group	374847	Korarchaeum cryptofilum (strain OPF8)	0	0	0	0	0	0	0	0
TACK group	436308	Nitrosopumilus maritimus (strain SCM1)	0	0	0	0	0	1	0	0
TACK group	273057	Sulfolobus solfataricus (strain ATCC 35092 / DSM 1617 / JCM 11322 / P2)	0	0	0	0	0	0	0	0
Terrabacteria group	441768	Acholeplasma laidlawii (strain PG-8A)	0	0	0	0	0	1	0	0
Terrabacteria group	591001	Acidaminococcus fermentans (strain ATCC 25085 / DSM 20731 / VR4)	0	0	0	0	0	1	0	0
Terrabacteria group	525909	Acidimicrobium ferrooxidans (strain DSM 10331 / JCM 15462 / NBRC 103882 / ICP)	0	0	0	0	0	0	0	0
Terrabacteria group	351607	Acidothermus cellulolyticus (strain ATCC 43068 / 11B)	0	0	0	0	0	0	0	0
Terrabacteria group	111015	Actinomyces radicidentis	0	0	0	0	0	1	0	0
Terrabacteria group	926569	Anaerolinea thermophila (strain DSM 14523 / JCM 11388 / NBRC 100420 / UNI-1)	0	0	0	0	0	0	0	0
Terrabacteria group	1794912	Anaerosporomusa subterranea	0	0	0	0	0	1	0	0
Terrabacteria group	290340	Arthrobacter aurescens (strain TC1)	0	0	0	0	0	1	0	0
Terrabacteria group	224308	Bacillus subtilis (strain 168)	0	0	0	0	0	1	0	0
Terrabacteria group	206672	Bifidobacterium longum (strain NCC 2705)	0	0	0	0	0	1	0	0
Terrabacteria group	273068	Caldanaerobacter subterraneus subsp. tengcongensis (strain DSM 15242 / JCM 11007 / NBRC 100824 / MB4)	0	0	0	0	0	0	1	0
Terrabacteria group	926550	Caldilinea aerophila (strain DSM 14535 / JCM 11387 / NBRC 104270 / STL-6-O1)	0	0	0	0	0	0	0	0
Terrabacteria group	479433	Catenulispora acidiphila (strain DSM 44928 / NRRL B-24433 / NBRC 102108 / JCM 14897)	0	0	0	0	0	0	1	0
Terrabacteria group	324602	Chloroflexus aurantiacus (strain ATCC 29366 / DSM 635 / J-10-fl)	0	0	0	0	0	0	1	0
Terrabacteria group	251229	Chroococcidiopsis thermalis PCC 7203	0	0	0	0	0	1	0	0
Terrabacteria group	1303518	Chthonomonas calidirosea (strain DSM 23976 / ICMP 18418 / T49)	0	0	0	0	0	1	0	0
Terrabacteria group	272562	Clostridium acetobutylicum (strain ATCC 824 / DSM 792 / JCM 1419 / LMG 5710 / VKM B-1787)	0	0	0	0	0	1	0	0
Terrabacteria group	469383	Conexibacter woesei (strain DSM 14684 / JCM 11494 / NBRC 100937 / ID131577)	0	0	0	0	0	1	0	0
Terrabacteria group	196627	Corynebacterium glutamicum (strain ATCC 13032 / DSM 20300 / JCM 1318 / LMG 3730 / NCIMB 10025)	0	0	0	0	0	1	0	0
Terrabacteria group	552811	Dehalogenimonas lykanthroporepellens (strain ATCC BAA-1523 / JCM 15061 / BL-DC-9)	0	0	0	0	0	0	0	0
Terrabacteria group	243230	Deinococcus radiodurans (strain ATCC 13939 / DSM 20539 / JCM 16871 / LMG 4051 / NBRC 15346 / NCIMB 9279 / R1 / VKM B-1422)	0	0	0	0	1	1	0	0
Terrabacteria group	479437	Eggerthella lenta (strain ATCC 25559 / DSM 2243 / JCM 9979 / NCTC 11813 / VPI 0255)	0	0	0	0	0	0	1	0
Terrabacteria group	226185	Enterococcus faecalis (strain ATCC 700802 / V583)	0	0	0	0	0	1	0	0
Terrabacteria group	650150	Erysipelothrix rhusiopathiae (strain Fujisawa)	0	0	0	0	0	0	0	0
Terrabacteria group	334413	Finegoldia magna (strain ATCC 29328)	0	0	0	0	0	1	0	0
Terrabacteria group	106370	Frankia sp. (strain CcI3)	0	0	0	0	0	0	0	0
Terrabacteria group	526225	Geodermatophilus obscurus (strain ATCC 25078 / DSM 43160 / JCM 3152 / G-20)	0	0	0	0	0	1	0	0
Terrabacteria group	251221	Gloeobacter violaceus (strain PCC 7421)	0	0	0	0	0	1	0	0
Terrabacteria group	373903	Halothermothrix orenii (strain H 168 / OCM 544 / DSM 9562)	0	0	0	0	0	1	0	0
Terrabacteria group	266940	Kineococcus radiotolerans (strain ATCC BAA-149 / DSM 14245 / SRS30216)	0	0	0	0	0	1	0	0
Terrabacteria group	272623	Lactococcus lactis subsp. lactis (strain IL1403)	0	0	0	0	0	1	0	0
Terrabacteria group	1555112	Limnochorda pilosa	0	0	0	0	0	1	0	0
Terrabacteria group	169963	Listeria monocytogenes serovar 1/2a (strain ATCC BAA-679 / EGD-e)	0	0	0	0	0	1	0	0
Terrabacteria group	265311	Mesoplasma florum (strain ATCC 33453 / NBRC 100688 / NCTC 11704 / L1)	0	0	0	0	0	1	0	0
Terrabacteria group	272631	Mycobacterium leprae (strain TN)	0	0	0	0	0	1	0	0
Terrabacteria group	83332	Mycobacterium tuberculosis (strain ATCC 25618 / H37Rv)	0	0	0	0	0	1	0	0
Terrabacteria group	243273	Mycoplasma genitalium (strain ATCC 33530 / G-37 / NCTC 10195)	0	0	0	0	0	0	0	0
Terrabacteria group	457570	Natranaerobius thermophilus (strain ATCC BAA-1301 / DSM 18059 / JW/NM-WN-LF)	0	0	0	0	0	1	0	0
Terrabacteria group	103690	Nostoc sp. (strain PCC 7120 / SAG 25.82 / UTEX 2576)	0	0	0	0	0	1	0	0
Terrabacteria group	633147	Olsenella uli (strain ATCC 49627 / DSM 7084 / CIP 109912 / JCM 12494 / NCIMB 702895 / VPI D76D-27C)	0	0	0	0	0	1	0	0
Terrabacteria group	267747	Propionibacterium acnes (strain KPA171202 / DSM 16379)	0	0	0	0	0	1	0	0
Terrabacteria group	266117	Rubrobacter xylanophilus (strain DSM 9941 / NBRC 16129)	0	0	0	0	0	0	0	0
Terrabacteria group	405948	Saccharopolyspora erythraea (strain ATCC 11635 / DSM 40517 / JCM 4748 / NBRC 13426 / NCIMB 8594 / NRRL 2338)	0	0	0	0	0	1	0	0
Terrabacteria group	369723	Salinispora tropica (strain ATCC BAA-916 / DSM 44818 / CNB-440)	0	0	0	0	0	1	0	0
Terrabacteria group	479434	Sphaerobacter thermophilus (strain DSM 20745 / S 6022)	0	0	0	0	0	0	0	0
Terrabacteria group	111780	Stanieria cyanosphaera (strain ATCC 29371 / PCC 7437)	0	0	0	0	1	1	0	0
Terrabacteria group	93061	Staphylococcus aureus (strain NCTC 8325)	0	0	0	0	0	0	0	0
Terrabacteria group	171101	Streptococcus pneumoniae (strain ATCC BAA-255 / R6)	0	0	0	0	0	1	0	0
Terrabacteria group	100226	Streptomyces coelicolor (strain ATCC BAA-471 / A3(2) / M145)	0	0	0	0	0	1	0	0
Terrabacteria group	1111708	Synechocystis sp. (strain PCC 6803 / Kazusa)	0	0	0	0	1	1	0	0
Terrabacteria group	269800	Thermobifida fusca (strain YX)	0	0	0	0	0	0	0	0
Terrabacteria group	300852	Thermus thermophilus (strain HB8 / ATCC 27634 / DSM 579)	0	0	0	0	1	0	0	0
Terrabacteria group	203124	Trichodesmium erythraeum (strain IMS101)	0	0	0	0	0	1	0	0
Terrabacteria group	203267	Tropheryma whipplei (strain Twist)	0	0	0	0	0	0	0	0
Terrabacteria group	479436	Veillonella parvula (strain ATCC 10790 / DSM 2008 / JCM 12972 / Te3)	0	0	0	0	0	1	0	0
