# Supplementary material for: Evolutionary Diversity of Dus2 Enzymes Reveals Novel Structural and Functional Features among Members of the RNA Dihydrouridine Synthases Family
Source: Biomolecules. 2022 Nov 26;12(12):1760. doi: 10.3390/biom12121760 (PMC9775027; doi:10.3390/biom12121760)
Supplement: Supplementary file 1 [file biomolecules-12-01760-s001.zip › table_s2.xlsx]

## Sheet: legend
Data Tabek S2. Dus2 Fusions and Sequence Disorder. Sequences curated from and merged between OrthoMCL, InterPro, and Pfam (see methods). Fusion “namesakes” assigned through CDD batch analysis (high specificity hit(s) of non-Dus domain(s) to identify respective Dus2 fusions). Similarly to the former dataset, taxonomic identifiers were assigned using UniProt records of respective accession entries.…

## Sheet: masterDus2_disorder
Organism	TaxID	Taxonomy	UniProtID	Namesake	Length	N-terminus	C-terminus	Nlength	Clength	TwoRegions	Ndisorder	Cdisorder
Guillardia theta CCMP2712|905079	905079	Other Eukaryota	L1IPD3	DUS_like_FMN	245	0	1	14	3	0	0	0
Dictyostelium discoideum|44689	44689	Amoebozoa	Q54QJ2	DUS_like_FMN	402	1	1	35	111	1	0	1
Entamoeba nuttalli P19|1076696	1076696	Amoebozoa	K2HDY1	DUS_like_FMN	366	1	1	28	108	1	0	0
Entamoeba dispar SAW760|370354	370354	Amoebozoa	B0EBU6	DUS_like_FMN	366	1	1	28	108	1	0	0
Entamoeba histolytica HM-3 IMSS|885315	885315	Amoebozoa	M7WFK4	DUS_like_FMN	366	1	1	28	108	1	0	0
Entamoeba histolytica KU27|885311	885311	Amoebozoa	M2RUW5	DUS_like_FMN	366	1	1	28	108	1	0	0
Entamoeba histolytica HM-1 IMSS-A|885318	885318	Amoebozoa	N9TAX2	DUS_like_FMN	366	1	1	28	108	1	0	0
Entamoeba histolytica HM-1 IMSS-B|885319	885319	Amoebozoa	M3UVD3	DUS_like_FMN	366	1	1	28	108	1	0	0
Trichomonas vaginalis|5722	5722	Excavata	A2F0D1	DUS_like_FMN	333	0	1	14	54	0	0	0
Tritrichomonas foetus|1144522	1144522	Excavata	A0A1J4JM35	DUS_like_FMN	322	0	1	15	52	0	0	0
Spironucleus salmonicida|348837	348837	Excavata	V6M519	DUS_like_FMN	335	0	1	3	64	0	0	0
Giardia muris|5742	5742	Excavata	A0A4Z1T3R5	DUS_like_FMN	391	1	1	21	177	1	0	0
Giardia intestinalis ATCC 50581|598745	598745	Excavata	C6LP18	DUS_like_FMN	431	0	1	15	209	0	0	0
Giardia lamblia ATCC 50803|184922	184922	Excavata	D3KG28	DUS_like_FMN	462	1	1	90	209	1	0	1
Giardia lamblia P15|658858	658858	Excavata	E1F0D0	DUS_like_FMN	462	1	1	84	238	1	0	0
Micromonas commoda|296587	296587	Excavata	C1EGQ3	DUS_like_FMN	353	0	1	11	98	0	0	0
Ostreococcus tauri|70448	70448	Excavata	Q01CW5	DUS_like_FMN	343	0	1	16	91	0	0	0
Volvox carteri f. nagariensis|3068	3068	Excavata	D8UHW4	DUS_like_FMN	252	0	1	5	22	0	0	0
Chlamydomonas reinhardtii|3055	3055	Excavata	A0A2K3D165	DUS_like_FMN	427	0	1	8	165	0	0	1
Chara braunii|69332	69332	Excavata	A0A388KWA7	DUS_like_FMN	436	0	1	11	187	0	0	1
Physcomitrium patens|3218	3218	Excavata	A9TP38	DUS_like_FMN	332	0	1	7	50	0	0	0
Arabidopsis thaliana|3702	3702	Excavata	F4IY04	DUS_like_FMN	329	0	1	8	73	0	0	0
Ricinus communis|3988	3988	Excavata	B9SSD6	DUS_like_FMN	330	0	1	8	48	0	0	0
Zea mays|4577	4577	Excavata	K7TQZ3	DUS_like_FMN	420	1	0	108	38	1	0	0
Oryza sativa Japonica Group|39947	39947	Excavata	Q7XUN7	DUS_like_FMN	319	0	1	8	37	0	0	0
Naegleria fowleri|5763	5763	Excavata	A0A6A5BF95	DUS_like_FMN	497	1	1	130	110	1	0	0
Naegleria gruberi|5762	5762	Excavata	D2VK62	DUS_like_FMN	388	1	1	36	99	1	1	1
Bodo saltans|75058	75058	Excavata	A0A0S4JLG1	DUS_like_FMN	502	1	1	165	131	1	0	0
Angomonas deanei|59799	59799	Excavata	A0A7G2C5V1	DUS_like_FMN	386	0	1	11	104	1	0	0
Trypanosoma vivax Y486|1055687	1055687	Excavata	G0U6D8	DUS_like_FMN	462	1	1	39	148	1	0	0
Trypanosoma congolense IL3000|1068625	1068625	Excavata	G0UW77	DUS_like_FMN	449	1	1	21	153	1	0	0
Trypanosoma theileri|67003	67003	Excavata	A0A1X0P8K8	DUS_like_FMN	427	0	1	8	144	1	0	0
Trypanosoma cruzi Dm28c|1416333	1416333	Excavata	V5DRQ6	DUS_like_FMN	430	0	1	8	146	1	0	1
Trypanosoma equiperdum|5694	5694	Excavata	A0A1G4IGG0	DUS_like_FMN	435	0	1	8	151	1	0	0
Trypanosoma brucei brucei TREU927|185431	185431	Excavata	Q38BB4	DUS_like_FMN	435	0	1	8	151	1	0	0
Trypanosoma brucei gambiense DAL972|679716	679716	Excavata	D0A2L3	DUS_like_FMN	435	0	1	8	152	1	0	0
Porcisia hertigi|2761500	2761500	Excavata	A0A836HED1	DUS_like_FMN	440	1	1	104	92	1	0	1
Leptomonas seymouri|5684	5684	Excavata	A0A0N0P6Z1	DUS_like_FMN	435	1	1	97	111	1	0	1
Leptomonas pyrrhocoris|157538	157538	Excavata	A0A0M9G0S1	DUS_like_FMN	442	0	1	19	110	1	0	1
Leishmania tarentolae|5689	5689	Excavata	A0A640L005	DUS_like_FMN	534	1	1	106	114	1	0	1
Leishmania panamensis|5679	5679	Excavata	A0A088S1X6	DUS_like_FMN	440	1	1	103	128	1	0	0
Leishmania braziliensis|5660	5660	Excavata	A4HNQ5	DUS_like_FMN	440	1	1	104	128	1	0	0
Leishmania orientalis|2249476	2249476	Excavata	A0A836G3F8	DUS_like_FMN	439	1	1	95	141	1	0	1
Leishmania enriettii|5663	5663	Excavata	A0A836G365	DUS_like_FMN	439	1	1	103	210	1	0	1
Leishmania sp. Namibia|2802991	2802991	Excavata	A0A836I1N3	DUS_like_FMN	439	1	1	96	410	1	0	1
Leishmania sp. Ghana 2012 LV757|2803181	2803181	Excavata	A0A836I673	DUS_like_FMN	439	0	1	12	133	1	0	1
Leishmania martiniquensis|1580590	1580590	Excavata	A0A836GTI8	DUS_like_FMN	440	0	1	12	142	1	0	0
Leishmania mexicana MHOM/GT/2001/U1103|929439	929439	Excavata	E9ASG4	DUS_like_FMN	440	1	1	104	124	1	0	1
Leishmania major|5664	5664	Excavata	Q4Q231	DUS_like_FMN	455	1	1	27	136	1	0	1
Leishmania donovani BPK282A1|981087	981087	Excavata	E9BTA9	DUS_like_FMN	439	1	1	104	130	1	0	0
Leishmania infantum|5671	5671	Excavata	A0A6L0XT19	DUS_like_FMN	439	1	1	104	130	1	0	0
Thalassiosira pseudonana|35128	35128	SAR	B8LBY8	DUS_like_FMN	242	0	1	5	2	1	0	0
Albugo laibachii Nc14|890382	890382	SAR	F0WRU8	ZnF_U1	427	0	1	10	402	1	0	1
Albugo candida|65357	65357	SAR	A0A024G1D8	ZnF_U1	429	0	1	10	155	1	0	0
Pythium insidiosum|114742	114742	SAR	A0A2D4CCN5	ZnF_U1, ICL_KPHMT	727	0	1	8	480	1	0	0
Globisporangium ultimum DAOM BR144|431595	431595	SAR	K3XBH1	ZnF_U1	470	0	1	8	217	1	0	1
Achlya hypogyna|1202772	1202772	SAR	A0A1V9ZGX1	ZnF_U1	424	0	1	8	173	1	0	0
Aphanomyces invadans|157072	157072	SAR	A0A024U0A2	DUS_like_FMN	307	0	1	11	46	1	0	0
Aphanomyces astaci|112090	112090	SAR	W4G8B6	ZnF_U1	430	0	1	9	143	1	0	1
Saprolegnia diclina VS20|1156394	1156394	SAR	T0RJH2	ZnF_U1	427	0	1	9	170	1	0	0
Saprolegnia parasitica CBS 223.65|695850	695850	SAR	A0A067CA09	ZnF_U1	425	0	1	9	151	1	0	0
Plasmopara halstedii|4781	4781	SAR	A0A0P1AUH8	ZnF_U1	475	0	1	7	216	1	0	0
Hyaloperonospora arabidopsidis Emoy2|559515	559515	SAR	M4BGV7	ZnF_U1	474	1	1	50	212	1	0	1
Nothophytophthora sp. Chile5|2483409	2483409	SAR	A0A662WJ20	ZnF_U1	529	0	1	7	224	1	0	1
Peronospora effusa|542832	542832	SAR	A0A3R7XBR0	ZnF_U1	500	0	1	7	222	1	0	1
Bremia lactucae|4779	4779	SAR	A0A484DW69	ZnF_U1	472	0	1	7	194	1	0	0
Phytophthora infestans T30-4|403677	403677	SAR	D0P0N4	ZnF_U1	480	0	1	7	226	1	0	1
Phytophthora rubi|129364	129364	SAR	A0A6A4FIL8	ZnF_U1	504	0	1	7	246	1	0	1
Phytophthora sojae strain P6497|1094619	1094619	SAR	G5AD05	ZnF_U1	505	0	1	7	252	1	0	1
Phytophthora palmivora var. palmivora|611791	611791	SAR	A0A2P4WWN1	ZnF_U1	496	0	1	7	241	1	0	1
Phytophthora cactorum|29920	29920	SAR	A0A329S5A4	ZnF_U1	487	0	1	7	232	1	0	1
Phytophthora kernoviae|325452	325452	SAR	A0A3R7JYU6	ZnF_U1	507	0	1	7	236	1	0	1
Phytophthora ramorum|164328	164328	SAR	H3GYM5	ZnF_U1	503	0	1	7	230	1	0	1
Phytophthora fragariae|53985	53985	SAR	A0A6A3TA19	ZnF_U1	504	0	1	7	246	1	0	1
Phytophthora nicotianae|4790	4790	SAR	A0A0W8C8Y9	ZnF_U1	456	0	1	7	223	1	0	1
Phytophthora parasitica P1569|1317065	1317065	SAR	V9EDN8	ZnF_U1	482	0	1	7	224	1	0	1
Phytophthora parasitica P1976|1317066	1317066	SAR	A0A080ZFD1	ZnF_U1	482	0	1	7	224	1	0	1
Phytophthora parasitica INRA-310|761204	761204	SAR	W2QXT9	ZnF_U1	482	0	1	7	224	1	0	1
Phytophthora parasitica P10297|1317064	1317064	SAR	W2YHX9	ZnF_U1	482	0	1	7	224	1	0	1
Phytophthora parasitica CJ01A1|1317063	1317063	SAR	W2W7J7	ZnF_U1	482	0	1	7	224	1	0	1
Chromera velia CCMP2878|1169474	1169474	SAR	A0A0G4F6M8	DUS_like_FMN	515	0	1	12	253	1	0	1
Vitrella brassicaformis CCMP3155|1169540	1169540	SAR	A0A0G4FEN4	DUS_like_FMN	419	0	1	25	147	1	0	1
Cryptosporidium andersoni|117008	117008	SAR	A0A1J4MTU9	DUS_like_FMN	330	0	1	7	7	1	0	0
Cryptosporidium muris RN66|441375	441375	SAR	B6AGI9	DUS_like_FMN	330	0	1	7	7	1	0	0
Cyclospora cayetanensis|88456	88456	SAR	A0A6P6RYJ1	DUS_like_FMN	559	1	1	225	72	1	1	0
Eimeria necatrix|51315	51315	SAR	U6MS20	DUS_like_FMN	511	1	1	194	85	1	1	0
Eimeria maxima|5804	5804	SAR	U6M9B8	DUS_like_FMN	493	1	1	224	72	1	1	0
Eimeria praecox|51316	51316	SAR	U6GP59	DUS_like_FMN	504	1	1	263	45	1	1	0
Eimeria brunetti|51314	51314	SAR	U6LJM2	DUS_like_FMN	533	1	1	199	87	1	1	0
Eimeria acervulina|5801	5801	SAR	U6GTL8	DUS_like_FMN	546	1	1	212	91	1	1	0
Eimeria tenella|5802	5802	SAR	H9B9U1	DUS_like_FMN	553	1	1	249	84	1	1	0
Eimeria mitis|44415	44415	SAR	U6KDE3	DUS_like_FMN	188	0	1	0	149	0	0	0
Besnoitia besnoiti|94643	94643	SAR	A0A2A9MDP1	DUS_like_FMN	622	1	1	236	150	1	1	0
Neospora caninum Liverpool|572307	572307	SAR	F0VEK8	DUS_like_FMN	663	1	1	267	155	1	1	0
Cystoisospora suis|483139	483139	SAR	A0A2C6L004	DUS_like_FMN	643	1	1	29	378	1	0	1
Toxoplasma gondii MAS|943118	943118	SAR	A0A086PTW9	DUS_like_FMN	653	1	1	256	157	1	1	1
Toxoplasma gondii TgCATBr9|943120	943120	SAR	A0A2T6IFL5	DUS_like_FMN	653	1	1	256	107	1	1	1
Toxoplasma gondii p89|943119	943119	SAR	A0A086J8M9	DUS_like_FMN	653	1	1	256	157	1	1	1
Toxoplasma gondii VEG|432359	432359	SAR	B9QPR1	DUS_like_FMN	653	1	1	256	157	1	1	1
Toxoplasma gondii FOU|943167	943167	SAR	A0A086JW49	DUS_like_FMN	653	1	1	256	158	1	1	1
Toxoplasma gondii ME49|508771	508771	SAR	A0A125YWY1	DUS_like_FMN	653	1	1	256	158	1	1	1
Toxoplasma gondii ARI|1074872	1074872	SAR	A0A139Y0R7	DUS_like_FMN	653	1	1	256	158	1	1	1
Toxoplasma gondii COUG|1074873	1074873	SAR	A0A2G8Y4L6	DUS_like_FMN	374	1	1	24	157	1	0	1
Toxoplasma gondii VAND|933077	933077	SAR	A0A086PII7	DUS_like_FMN	653	1	1	256	156	1	1	1
Toxoplasma gondii GAB2-2007-GAL-DOM2|1130820	1130820	SAR	A0A086JJP5	DUS_like_FMN	653	1	1	256	157	1	1	1
Toxoplasma gondii RUB|935652	935652	SAR	A0A086LL69	DUS_like_FMN	653	1	1	256	157	1	1	1
Toxoplasma gondii TgCatPRC2|1130821	1130821	SAR	A0A151H1K4	DUS_like_FMN	653	1	1	255	159	1	1	1
Toxoplasma gondii CAST|943122	943122	SAR	A0A425I2C6	DUS_like_FMN	653	1	1	256	157	1	1	1
Toxoplasma gondii GT1|507601	507601	SAR	S7UTR6	DUS_like_FMN	653	1	1	256	158	1	1	1
Sphaeroforma arctica JP610|667725	667725	Opisthokonta	A0A0L0FS75	DSRM_DUS2L	534	1	1	70	179	1	1	0
Fonticula alba|691883	691883	Opisthokonta	A0A058ZDY5	zf-NADH-PPase/nudix	793	1	1	42	526	1	0	1
Capsaspora owczarzaki ATCC 30864|595528	595528	Opisthokonta	A0A0D2X5C5	DSRM_DUS2L	719	1	1	205	274	1	1	1
Monosiga brevicollis|81824	81824	Opisthokonta	A9V413	DSRM_DUS2L	487	0	1	9	221	1	0	0
Salpingoeca rosetta|946362	946362	Opisthokonta	F2UB60	DSRM_DUS2L	521	1	1	27	191	1	0	1
Amphimedon queenslandica|400682	400682	Opisthokonta	A0A1X7V4K0	DSRM_DUS2L	464	0	1	18	197	0	0	0
Nematostella vectensis|45351	45351	Opisthokonta	A7SAL7	DSRM_DUS2L	440	0	1	4	195	0	0	0
Trichoplax adhaerens|10228	10228	Opisthokonta	B3RJI3	DUS_like_FMN	300	0	1	4	45	0	0	0
Branchiostoma floridae|7739	7739	Opisthokonta	C3XTV8	DSRM_DUS2L	444	0	1	16	186	0	0	0
Callorhinchus milii|7868	7868	Opisthokonta	A0A4W3KFW1	DSRM_DUS2L	464	1	1	20	238	1	0	0
Lepisosteus oculatus|7918	7918	Opisthokonta	W5MN78	DSRM_DUS2L	498	0	1	17	154	0	0	1
Danio rerio|7955	7955	Opisthokonta	E7F220	DSRM_DUS2L	504	0	1	17	239	0	0	1
Tetraodon nigroviridis|99883	99883	Opisthokonta	H3CJ89	DSRM_DUS2L	473	0	1	13	214	0	0	0
Takifugu rubripes|31033	31033	Opisthokonta	A0A3B5KL64	DSRM_DUS2L	491	0	1	15	251	0	0	0
Oryzias latipes|8090	8090	Opisthokonta	H2L5F3	DSRM_DUS2L	499	0	1	16	165	0	0	0
Amphiprion percula|161767	161767	Opisthokonta	A0A3P8T106	DSRM_DUS2L	491	0	1	15	252	0	0	1
Salarias fasciatus|181472	181472	Opisthokonta	A0A672FQK2	DSRM_DUS2L	453	0	1	13	232	0	0	1
Xenopus tropicalis|8364	8364	Opisthokonta	F7C235/Q28CN6	DSRM_DUS2L	495	0	1	8	216	0	0	1
Geotrypetes seraphini|260995	260995	Opisthokonta	A0A6P8RC08	DSRM_DUS2L	500	1	1	43	205	1	0	0
Gallus gallus|9031	9031	Opisthokonta	E1C4F6	DSRM_DUS2L	490	0	1	11	155	0	0	1
Pseudonaja textilis|8673	8673	Opisthokonta	A0A670Y906	DSRM_DUS2L	466	0	1	14	157	0	0	0
Monodelphis domestica|13616	13616	Opisthokonta	F7E6L5	DSRM_DUS2L	495	0	1	12	160	0	0	1
Loxodonta africana|9785	9785	Opisthokonta	G3TDI2	DSRM_DUS2L	493	0	1	12	208	0	0	1
Equus caballus|9796	9796	Opisthokonta	A0A3Q2HAK2	DSRM_DUS2L	741	1	1	260	208	1	1	1
Canis lupus familiaris|9615	9615	Opisthokonta	E2RKU2	DSRM_DUS2L	493	0	1	12	208	0	0	1
Leptonychotes weddellii|9713	9713	Opisthokonta	A0A7F8QGN2	DSRM_DUS2L	555	1	1	31	208	1	0	1
Myotis lucifugus|59463	59463	Opisthokonta	G1P5U5	DSRM_DUS2L	493	0	1	12	208	0	0	1
Myotis myotis|51298	51298	Opisthokonta	A0A7J7SBF3	DSRM_DUS2L	530	0	1	12	208	0	0	1
Physeter catodon|9755	9755	Opisthokonta	A0A2Y9SYB7	DSRM_DUS2L	500	0	1	12	208	0	0	1
Bos taurus|9913	9913	Opisthokonta	Q0VC60	DSRM_DUS2L	493	0	1	12	208	0	0	1
Rattus norvegicus|10116	10116	Opisthokonta	B0BN89	DSRM_DUS2L	493	0	1	12	208	0	0	1
Mus musculus|10090	10090	Opisthokonta	Q9D7B1	DSRM_DUS2L	493	0	1	12	208	0	0	1
Cebus imitator|2715852	2715852	Opisthokonta	A0A2K5P8Z4	DSRM_DUS2L	477	0	1	12	208	0	0	1
Callithrix jacchus|9483	9483	Opisthokonta	F7I5L3	DSRM_DUS2L	480	0	1	12	208	0	0	1
Macaca fascicularis|9541	9541	Opisthokonta	G7Q1G1	DSRM_DUS2L	509	1	1	28	208	1	0	1
Macaca mulatta|9544	9544	Opisthokonta	A0A5F8AQ14	DSRM_DUS2L	509	1	1	28	208	1	0	1
Gorilla gorilla gorilla|9595	9595	Opisthokonta	G3QWR0	DSRM_DUS2L	535	1	1	87	208	1	0	1
Homo sapiens|9606	9606	Opisthokonta	Q9NX74	DSRM_DUS2L	493	0	1	12	208	0	0	1
Pan troglodytes|9598	9598	Opisthokonta	H2QZU3	DSRM_DUS2L	493	0	1	12	208	0	0	1
Brachionus plicatilis|10195	10195	Opisthokonta	A0A3M7R9U5	DSRM_DUS2L	446	0	1	5	199	0	0	1
Lingula anatina|7574	7574	Opisthokonta	A0A1S3J214	DSRM_DUS2L	563	0	1	12	293	0	0	1
Biomphalaria glabrata|6526	6526	Opisthokonta	A0A2C9L861	DUS_like_FMN	250	1	1	86	113	1	0	0
Helobdella robusta|6412	6412	Opisthokonta	T1G751	DUS_like_FMN	313	0	1	14	77	0	0	0
Schistosoma bovis|6184	6184	Opisthokonta	A0A430QHR8	DSRM_DUS2L	431	0	1	5	246	0	0	0
Schistosoma mansoni|6183	6183	Opisthokonta	G4VKS3	DSRM_DUS2L	491	0	1	0	250	0	0	0
Schistosoma haematobium|6185	6185	Opisthokonta	A0A095C0C7	DSRM_DUS2L	519	1	1	20	298	1	0	0
Toxocara canis|6265	6265	Opisthokonta	A0A0B2V0Y9	DSRM_DUS2L	552	0	1	13	221	0	0	0
Caenorhabditis elegans|6239	6239	Opisthokonta	Q9XWJ9	DSRM_DUS2L	436	0	1	7	161	0	0	0
Caenorhabditis briggsae|6238	6238	Opisthokonta	A8XWE5	DSRM_DUS2L	436	0	1	7	168	0	0	0
Trichinella nelsoni|6336	6336	Opisthokonta	A0A0V0SLU1	DSRM_DUS2L, PQ-loop, CTNS	761	1	1	36	434	1	0	0
Trichinella pseudospiralis|6337	6337	Opisthokonta	A0A0V1JRK3	DSRM_DUS2L, PQ-Loop, CTNS	922	0	1	14	622	0	0	1
Trichinella murrelli|144512	144512	Opisthokonta	A0A0V0UBU9	DSRM_DUS2L, PQ-loop, CTNS	767	0	1	36	440	1	0	0
Trichinella zimbabwensis|268475	268475	Opisthokonta	A0A0V1I572	DSRM_DUS2L, PQ-Loop, CTNS	911	0	1	14	605	0	0	1
Trichinella spiralis|6334	6334	Opisthokonta	A0A0V1C168	DSRM_DUS2L, PQ-loop, CTNS	766	1	1	36	439	1	0	0
Trichinella nativa|6335	6335	Opisthokonta	A0A0V1LPU9	DSRM_DUS2L, PQ-loop, CTNS	767	1	1	36	440	1	0	0
Trichinella patagoniensis|990121	990121	Opisthokonta	A0A0V1A1F5	DSRM_DUS2L, PQ-loop, CTNS	766	1	1	46	429	1	0	0
Trichinella papuae|268474	268474	Opisthokonta	A0A0V1MLG7	DSRM_DUS2L, PQ-loop, CTNS	744	0	1	14	438	0	0	0
Trichinella sp. T6|92179	92179	Opisthokonta	A0A0V0WR06	DSRM_DUS2L, PQ-loop, CTNS	767	1	1	36	440	1	0	0
Trichinella sp. T8|92180	92180	Opisthokonta	A0A0V1PPG6	DSRM_DUS2L, PQ-loop, CTNS	767	1	1	36	440	1	0	0
Trichinella sp. T9|181606	181606	Opisthokonta	A0A0V0VEV2	DSRM_DUS2L, PQ-loop, CTNS	785	1	1	36	458	1	0	0
Ramazzottius varieornatus|947166	947166	Opisthokonta	A0A1D1VWW8	DSRM_DUS2L	447	0	1	9	190	0	0	0
Ixodes scapularis|6945	6945	Opisthokonta	B7PUU2	DSRM_DUS2L	449	0	1	9	139	0	0	0
Leptotrombidium deliense|299467	299467	Opisthokonta	A0A443S4S7	DSRM_DUS2L	462	0	1	7	182	0	0	0
Sarcoptes scabiei|52283	52283	Opisthokonta	A0A131ZYL1	DSRM_DUS2L	490	0	1	12	198	0	0	0
Pediculus humanus corporis|121224	121224	Opisthokonta	E0VBT5	DSRM_DUS2L	409	0	1	8	159	0	0	0
Acyrthosiphon pisum|7029	7029	Opisthokonta	J9JMS0	DSRM_DUS2L	456	0	1	14	159	0	0	0
Cimex lectularius|79782	79782	Opisthokonta	A0A7E4RP10	DSRM_DUS2L	425	1	1	25	118	0	0	0
Rhodnius prolixus|13249	13249	Opisthokonta	T1ICE0	DSRM_DUS2L	452	0	1	16	189	0	0	0
Tribolium castaneum|7070	7070	Opisthokonta	D6WK97	DSRM_DUS2L	455	0	1	12	200	0	0	0
Papilio machaon|76193	76193	Opisthokonta	A0A194RBE1	DSRM_DUS2L	450	0	1	6	201	0	0	0
Bombyx mori|7091	7091	Opisthokonta	H9J9P0	DUS_like_FMN	415	0	0	0	179	0	0	0
Drosophila melanogaster|7227	7227	Opisthokonta	Q9VY45	DSRM_DUS2L	473	1	1	24	207	1	0	0
Musca domestica|7370	7370	Opisthokonta	A0A1I8M5P6	DSRM_DUS2L	479	1	1	22	215	1	0	0
Stomoxys calcitrans|35570	35570	Opisthokonta	A0A1I8NNM8	DSRM_DUS2L	477	1	1	22	213	1	0	0
Glossina brevipalpis|37001	37001	Opisthokonta	A0A1A9WAH1	DSRM_DUS2L	483	1	1	27	216	1	0	0
Glossina fuscipes fuscipes|201502	201502	Opisthokonta	A0A1A9Y1F8	DSRM_DUS2L	483	1	1	27	216	1	0	0
Glossina palpalis gambiensis|67801	67801	Opisthokonta	A0A1B0ARY0	DSRM_DUS2L	483	1	1	27	216	1	0	0
Glossina morsitans morsitans|37546	37546	Opisthokonta	A0A1B0G1R2	DSRM_DUS2L	479	1	1	25	212	1	0	0
Glossina pallidipes|7398	7398	Opisthokonta	A0A1B0ABY1	DSRM_DUS2L	523	1	1	65	216	1	0	0
Glossina austeni|7395	7395	Opisthokonta	A0A1A9UHP4	DSRM_DUS2L	483	1	1	25	216	1	0	0
Culicoides sonorensis|179676	179676	Opisthokonta	A0A336LH12	DSRM_DUS2L	461	0	1	12	202	0	0	0
Aedes albopictus|7160	7160	Opisthokonta	A0A182G406	DSRM_DUS2L	461	0	1	9	205	0	0	1
Aedes aegypti|7159	7159	Opisthokonta	Q16MZ6	DSRM_DUS2L	461	0	1	9	205	0	0	0
Anopheles darlingi|43151	43151	Opisthokonta	W5JDW9	DSRM_DUS2L	512	0	1	13	257	0	0	1
Anopheles albimanus|7167	7167	Opisthokonta	A0A182FIC2	DSRM_DUS2L	505	0	1	13	250	0	0	1
Anopheles sinensis|74873	74873	Opisthokonta	A0A084WFE5	DSRM_DUS2L	505	0	1	0	270	0	0	1
Anopheles atroparvus|41427	41427	Opisthokonta	A0A182JM36	DSRM_DUS2L	522	0	1	9	272	0	0	0
Anopheles dirus|7168	7168	Opisthokonta	A0A182N126	DSRM_DUS2L	480	0	1	9	230	0	0	1
Anopheles farauti|69004	69004	Opisthokonta	A0A182Q853	DSRM_DUS2L	510	1	1	37	231	1	0	0
Anopheles maculatus|74869	74869	Opisthokonta	A0A182S7Z2	DSRM_DUS2L	516	0	1	9	266	0	0	1
Anopheles stephensi|30069	30069	Opisthokonta	A0A182XYC0	DSRM_DUS2L	524	0	1	9	274	0	0	1
Anopheles funestus|62324	62324	Opisthokonta	A0A182R245	DSRM_DUS2L	499	0	1	9	249	0	0	1
Anopheles minimus|112268	112268	Opisthokonta	A0A182VVG8	DSRM_DUS2L	486	0	1	0	253	0	0	1
Anopheles culicifacies|139723	139723	Opisthokonta	A0A182MQ90	DSRM_DUS2L	534	0	1	9	284	0	0	1
Anopheles epiroticus|199890	199890	Opisthokonta	A0A182PVR9	DSRM_DUS2L	509	0	1	9	259	0	0	1
Anopheles melas|34690	34690	Opisthokonta	A0A182UE82	DSRM_DUS2L	506	0	1	9	256	0	0	1
Anopheles coluzzii|1518534	1518534	Opisthokonta	A0A6E8UZ40	DSRM_DUS2L	506	0	1	9	256	0	0	1
Anopheles quadriannulatus|34691	34691	Opisthokonta	A0A182WZ85	DSRM_DUS2L	506	0	1	9	256	0	0	1
Anopheles arabiensis|7173	7173	Opisthokonta	A0A182HMQ5	DSRM_DUS2L	506	0	1	9	256	0	0	1
Anopheles gambiae|7165	7165	Opisthokonta	Q7Q4V6	DSRM_DUS2L	506	0	1	9	256	0	0	1
Anopheles merus|30066	30066	Opisthokonta	A0A182VCG1	DSRM_DUS2L	544	1	1	47	256	0	0	1
Conidiobolus coronatus NRRL 28638|796925	796925	Fungi	A0A137P066	DUS_like_FMN	345	0	1	15	86	0	0	0
Rozella allomycis CSF55|988480	988480	Fungi	A0A075B442	DUS_like_FMN	362	0	1	8	44	0	0	0
Batrachochytrium dendrobatidis JEL423|403673	403673	Fungi	A0A177WMJ3	DUS_like_FMN	343	0	1	9	62	0	0	0
Spizellomyces punctatus DAOM BR117|645134	645134	Fungi	A0A0L0HE26	DUS_like_FMN	409	1	1	44	120	1	0	0
Nematocida parisii ERTm3|935791	935791	Fungi	I3EDT1	DUS_like_FMN	400	1	1	30	126	1	0	0
Mitosporidium daphniae|1485682	1485682	Fungi	A0A098VU83	DUS_like_FMN	346	0	1	0	64	1	0	0
Catenaria anguillulae PL171|765915	765915	Fungi	A0A1Y2HLG6	DUS_like_FMN	369	0	1	15	141	0	0	1
Allomyces macrogynus ATCC 38327|578462	578462	Fungi	A0A0L0SJH0	DUS_like_FMN	434	0	1	14	145	0	0	1
Rhizophagus irregularis DAOM 181602=DAOM 197198|747089	747089	Fungi	A0A2P4PR67	DUS_like_FMN	335	0	1	9	82	0	0	0
Phycomyces blakesleeanus NRRL 1555 -|763407	763407	Fungi	A0A167NVW8	DUS_like_FMN	238	0	0	10	18	0	0	0
Rhizopus delemar RA 99-880|246409	246409	Fungi	I1BPR6	DUS_like_FMN	362	0	1	12	136	0	0	1
Mucor circinelloides 1006PhL|1220926	1220926	Fungi	S2JBR0	DUS_like_FMN	366	0	1	14	112	0	0	1
Mucor lusitanicus CBS 277.49|747725	747725	Fungi	A0A168H817	DUS_like_FMN	341	0	1	14	87	0	0	1
Wallemia mellicola CBS 633.66|671144	671144	Fungi	I4YIH6	DUS_like_FMN	333	0	1	0	94	0	0	0
Rhodotorula taiwanensis|741276	741276	Fungi	A0A2S5B751	DUS_like_FMN	509	1	1	79	44	1	1	1
Melampsora larici-populina 98AG31|747676	747676	Fungi	F4RA65	DUS_like_FMN	377	1	1	101	29	1	1	0
Puccinia triticina 1-1 BBBD Race 1|630390	630390	Fungi	A0A180GGJ4	DUS_like_FMN	423	1	1	75	70	1	1	0
Puccinia striiformis|27350	27350	Fungi	A0A2S4VNX3	DUS_like_FMN	684	1	1	76	100	1	1	0
Puccinia graminis f. sp. tritici CRL 75-36-700-3|418459	418459	Fungi	E3JR45	DUS_like_FMN	423	1	1	74	28	1	0	0
Laccaria bicolor S238N-H82|486041	486041	Fungi	B0CNE7	DUS_like_FMN	308	1	1	31	32	1	0	0
Coprinopsis cinerea okayama7#130|240176	240176	Fungi	A8N3D2	DUS_like_FMN	454	1	1	52	90	1	0	1
Pleurotus ostreatus PC15|1137138	1137138	Fungi	A0A067P696	DUS_like_FMN	453	1	1	33	139	1	1	1
Trichosporon asahii var. asahii CBS 2479|1186058	1186058	Fungi	J5R044	DUS_like_FMN	469	1	1	74	179	1	1	1
Tremella mesenterica|5217	5217	Fungi	A0A4Q1BEE5	DUS_like_FMN	538	1	1	124	174	1	1	0
Kwoniella dejecticola CBS 10117|1296121	1296121	Fungi	A0A1A5ZXC6	DUS_like_FMN	446	1	1	62	145	1	0	1
Kwoniella heveanensis CBS 569|1296119	1296119	Fungi	A0A1B9H6S7	DUS_like_FMN	520	1	1	122	158	1	1	0
Kwoniella mangroviensis CBS 10435|1331196	1331196	Fungi	A0A1B9J360	DUS_like_FMN	460	1	1	84	137	1	1	0
Kwoniella bestiolae CBS 10118|1296100	1296100	Fungi	A0A1B9FUM8	DUS_like_FMN	434	1	1	55	140	1	1	1
Cryptococcus neoformans var. grubii H99|235443	235443	Fungi	J9VSI0	DUS_like_FMN	494	1	1	114	145	1	1	0
Cryptococcus neoformans var. neoformans JEC21|214684	214684	Fungi	Q5KGN9	DUS_like_FMN	491	1	1	111	145	1	1	0
Cryptococcus neoformans var. neoformans B-3501A|283643	283643	Fungi	Q55S93	DUS_like_FMN	491	1	1	111	145	1	1	0
Cryptococcus gattii CA1280|1296109	1296109	Fungi	A0A0D0UER3	DUS_like_FMN	493	1	1	114	144	1	1	0
Cryptococcus gattii VGIV IND107|1296105	1296105	Fungi	A0A0D0WRS2	DUS_like_FMN	493	1	1	114	144	1	1	0
Cryptococcus gattii VGII Ram5|1296110	1296110	Fungi	A0A0D0UYV9	DUS_like_FMN	493	1	1	114	144	1	1	0
Cryptococcus gattii EJB2|1296103	1296103	Fungi	A0A0D0WYX8	DUS_like_FMN	493	1	1	114	144	1	1	0
Cryptococcus gattii WM276|367775	367775	Fungi	E6R742	DUS_like_FMN	493	1	1	114	144	1	1	0
Malassezia restricta CBS 7877|425264	425264	Fungi	A0A3G2S9U1	DUS_like_FMN	385	1	1	36	87	1	0	0
Malassezia sympodialis ATCC 42132|1230383	1230383	Fungi	A0A1M8A7N6	DUS_like_FMN	392	1	1	41	89	1	1	0
Malassezia globosa CBS 7966|425265	425265	Fungi	A8QCA8	DUS_like_FMN	395	1	1	45	88	1	1	0
Testicularia cyperi|1882483	1882483	Fungi	A0A317XMA4	Pyridox_oxase_2	910	1	1	216	393	1	1	1
Melanopsichium pennsylvanicum 4|1398559	1398559	Fungi	A0A077QUQ8	Pyridox_oxase_2	770	1	1	84	424	1	1	1
Kalmanozyma brasiliensis GHG001|1365824	1365824	Fungi	V5ET94	Pyridox_oxase_2	763	1	1	75	406	1	1	1
Moesziomyces antarcticus T-34|1151754	1151754	Fungi	M9MHI3	Pyridox_oxase_2	840	1	1	152	425	1	0	1
Moesziomyces aphidis DSM 70725|1391700	1391700	Fungi	W3VKR7	Pyridox_oxase_2	840	1	1	152	425	1	0	1
Pseudozyma flocculosa PF-1|1277687	1277687	Fungi	A0A061H543	Pyridox_oxase_2	757	1	1	66	432	1	0	1
Pseudozyma hubeiensis SY62|1305764	1305764	Fungi	R9P8B6	Pyridox_oxase_2	739	1	1	56	418	1	0	1
Ustilago trichophora|86804	86804	Fungi	A0A5C3DZT2	Pyridox_oxase_2	833	1	1	148	359	1	0	1
Ustilago bromivora|307758	307758	Fungi	A0A1K0H4H0	Pyridox_oxase_2	801	1	1	80	458	1	1	1
Ustilago hordei Uh4857-4|1128400	1128400	Fungi	I2G007	Pyridox_oxase_2	797	1	1	80	449	1	1	1
Ustilago maydis 521|237631	237631	Fungi	A0A0D1DXR9	Pyridox_oxase_2	766	1	1	79	425	1	1	1
Sporisorium scitamineum|49012	49012	Fungi	A0A0F7S3U6	Pyridox_oxase_2	830	1	1	139	424	1	0	1
Sporisorium graminicola|280036	280036	Fungi	A0A4U7KXE7	Pyridox_oxase_2	835	1	1	147	425	1	0	1
Sporisorium reilianum SRZ2|999809	999809	Fungi	E7A1F7	Pyridox_oxase_2	772	1	1	84	426	1	1	1
Sporisorium reilianum f. sp. reilianum|72559	72559	Fungi	A0A2N8UEG5	Pyridox_oxase_2	772	1	1	84	426	1	1	1
Pneumocystis sp. 'macacae'|2698480	2698480	Fungi	A0A8H8A6I6	DUS_like_FMN	326	0	1	14	68	0	0	0
Pneumocystis jirovecii SE8|1209962	1209962	Fungi	L0PDR1	DUS_like_FMN	325	0	1	13	66	0	0	0
Pneumocystis wakefieldiae|38082	38082	Fungi	A0A899FYF0	DUS_like_FMN	373	1	1	61	59	1	0	0
Schizosaccharomyces japonicus yFS275|402676	402676	Fungi	B6K3P6	DUS_like_FMN	462	0	1	0	219	0	0	0
Schizosaccharomyces pombe 972h-|284812	284812	Fungi	O74731	DUS_like_FMN	479	0	1	8	160	0	0	0
Schizosaccharomyces octosporus yFS286|483514	483514	Fungi	S9Q2E5	DUS_like_FMN	486	0	1	11	229	0	0	0
Cyberlindnera fabianii|36022	36022	Fungi	A0A1V2LAF2	DUS_like_FMN	371	1	1	31	39	1	0	1
Yarrowia lipolytica CLIB122|284591	284591	Fungi	Q6C002	DUS_like_FMN	394	1	1	31	60	1	0	1
Pichia kudriavzevii|4909	4909	Fungi	A0A2U9R2F8	DUS_like_FMN	367	0	1	11	52	0	0	0
Diutina rugosa|5481	5481	Fungi	A0A642UKV1	DUS_like_FMN	392	0	1	8	132	0	0	1
Trichomonascus ciferrii|44093	44093	Fungi	A0A642UYI2	DUS_like_FMN	303	1	1	20	72	1	0	1
Hanseniaspora uvarum|29833	29833	Fungi	A0A1E5RCI2	DUS_like_FMN	399	1	1	32	99	1	0	1
Hanseniaspora guilliermondii|56406	56406	Fungi	A0A1L0AYT8	DUS_like_FMN	399	1	1	32	97	1	0	1
Candida glabrata CBS 138|284593	284593	Fungi	Q6FQK2	DUS_like_FMN	371	0	1	9	57	0	0	1
Saccharomyces cerevisiae S288C|559292	559292	Fungi	P53720	DUS_like_FMN	384	0	1	6	31	0	0	1
Eremothecium gossypii ATCC 10895|284811	284811	Fungi	Q75EK7	DUS_like_FMN	384	1	1	31	74	1	0	1
Kluyveromyces lactis NRRL Y-1140|284590	284590	Fungi	Q6CL33	DUS_like_FMN	359	1	1	31	49	1	0	0
Clavispora lusitaniae ATCC 42720|306902	306902	Fungi	C4Y679	DUS_like_FMN	393	1	1	50	53	1	0	0
Candida pseudohaemulonii|418784	418784	Fungi	A0A2P7YHA4	DUS_like_FMN	379	1	1	31	111	1	0	0
Candida auris|498019	498019	Fungi	A0A0L0P113	DUS_like_FMN	399	1	1	51	66	1	0	0
Candida haemuloni|45357	45357	Fungi	A0A2V1AMI5	DUS_like_FMN	379	1	1	31	112	1	0	0
Candida duobushaemulonis|1231522	1231522	Fungi	A0A2V1AA44	DUS_like_FMN	400	1	1	31	132	1	0	1
Scheffersomyces stipitis CBS 6054|322104	322104	Fungi	A3LU67	DUS_like_FMN	390	1	1	31	132	1	0	1
Meyerozyma guilliermondii ATCC 6260|294746	294746	Fungi	A5DC04	DUS_like_FMN	362	1	1	31	107	1	0	1
Debaryomyces hansenii CBS767|284592	284592	Fungi	Q6BX60	DUS_like_FMN	446	1	1	81	107	1	0	0
Lodderomyces elongisporus NRRL YB-4239|379508	379508	Fungi	A5DYF6	DUS_like_FMN	504	1	1	36	155	1	0	1
Candida metapsilosis|273372	273372	Fungi	A0A8H7ZGL3	DUS_like_FMN	471	1	1	35	122	1	0	1
Candida dubliniensis CD36|573826	573826	Fungi	B9WCQ4	DUS_like_FMN	451	0	1	9	113	0	0	1
Candida tropicalis MYA-3404|294747	294747	Fungi	C5M505	DUS_like_FMN	428	0	1	13	121	0	0	1
Candida parapsilosis CDC317|578454	578454	Fungi	G8BJU5	DUS_like_FMN	458	1	1	35	116	1	0	0
Candida albicans SC5314|237561	237561	Fungi	A0A1D8PIL3	DUS_like_FMN	433	0	1	9	118	0	0	1
Candida albicans WO-1|294748	294748	Fungi	C4YKQ5	DUS_like_FMN	433	0	1	9	118	0	0	1
Tuber melanosporum Mel28|656061	656061	Fungi	D5GJ83	DUS_like_FMN	386	0	1	6	119	0	0	1
Arthrobotrys flagrans|97331	97331	Fungi	A0A436ZPM6	DUS_like_FMN	450	1	1	43	164	1	1	1
Verruconis gallopava|253628	253628	Fungi	A0A0D2B9L1	DUS_like_FMN	428	1	1	37	115	1	0	0
Zymoseptoria tritici IPO323|336722	336722	Fungi	F9XAY3	DUS_like_FMN	438	1	1	93	140	1	0	1
Zymoseptoria tritici ST99CH 3D7|1276538	1276538	Fungi	A0A1X7RVK8	DUS_like_FMN	444	1	1	99	140	1	0	1
Pseudogymnoascus destructans 20631-21|658429	658429	Fungi	L8GB93	DUS_like_FMN	443	1	1	30	176	1	0	1
Sclerotinia sclerotiorum 1980 UF-70|665079	665079	Fungi	A0A1D9PVB2	DUS_like_FMN	513	1	1	131	89	1	0	1
Botrytis cinerea B05.10|332648	332648	Fungi	A0A384J4S7	DUS_like_FMN	434	1	1	31	80	1	0	1
Pyricularia oryzae 70-15|242507	242507	Fungi	G4MUD8	DUS_like_FMN	441	1	1	33	153	1	0	1
Ophiostoma piceae UAMH 11346|1262450	1262450	Fungi	S3BW48	DUS_like_FMN	460	1	1	23	185	1	0	1
Sporothrix schenckii 1099-18|1397361	1397361	Fungi	A0A0F2M346	DUS_like_FMN	475	1	1	120	140	1	0	1
Sporothrix brasiliensis 5110|1398154	1398154	Fungi	A0A0C2IUD7	DUS_like_FMN	445	1	1	23	140	1	0	1
Thermothelomyces thermophilus ATCC 42464|573729	573729	Fungi	G2Q345	DUS_like_FMN	505	1	1	152	159	1	1	1
Podospora anserina S mat+|515849	515849	Fungi	B2A8U0	DUS_like_FMN	516	1	1	121	102	1	0	1
Sordaria macrospora k-hell|771870	771870	Fungi	F7VKI7	DUS_like_FMN	456	1	1	104	134	1	0	1
Neurospora crassa OR74A|367110	367110	Fungi	Q7SGH2	DUS_like_FMN	487	1	1	56	149	1	0	1
Neurospora tetrasperma FGSC 2508|510951	510951	Fungi	F8N0P4	DUS_like_FMN	472	1	1	43	147	1	0	1
Colletotrichum graminicola M1.001|645133	645133	Fungi	E3Q652	DUS_like_FMN	427	1	1	102	88	1	0	1
Lomentospora prolificans|41688	41688	Fungi	A0A2N3NDR0	DUS_like_FMN	424	1	1	92	148	1	0	1
Scedosporium apiospermum|563466	563466	Fungi	A0A084GA80	DUS_like_FMN	420	1	1	89	144	1	1	1
Claviceps purpurea 20.1|1111077	1111077	Fungi	M1VUK1	DUS_like_FMN	417	1	1	90	120	1	0	1
Trichoderma virens Gv29-8|413071	413071	Fungi	G9NCI4	DUS_like_FMN	413	1	1	44	116	1	0	1
Trichoderma reesei QM6a|431241	431241	Fungi	G0RFE0	DUS_like_FMN	415	1	1	45	120	1	0	1
Trichoderma reesei RUT C-30|1344414	1344414	Fungi	A0A024SIG9	DUS_like_FMN	415	1	1	45	120	1	0	1
Fusarium graminearum PH-1|229533	229533	Fungi	A0A1C3YKR0	DUS_like_FMN	425	1	1	102	137	1	0	1
Fusarium fujikuroi IMI 58289|1279085	1279085	Fungi	S0DU88	DUS_like_FMN	420	1	1	91	139	1	0	1
Fusarium verticillioides 7600|334819	334819	Fungi	W7M8M3	DUS_like_FMN	277	1	1	99	19	1	0	0
Fusarium proliferatum ET1|1227346	1227346	Fungi	A0A1L7VGZ4	DUS_like_FMN	420	1	1	90	136	1	0	1
Fusarium circinatum|48490	48490	Fungi	A0A8H5UEF0	DUS_like_FMN	420	1	1	90	132	1	0	1
Fusarium odoratissimum NRRL 54006|1089451	1089451	Fungi	X0J299	DUS_like_FMN	429	1	1	99	135	1	0	1
Fusarium oxysporum Fo47|660027	660027	Fungi	W9KJF4	DUS_like_FMN	429	1	1	99	135	1	0	1
Fusarium oxysporum f. sp. cubense race 1|1229664	1229664	Fungi	N4TLY4	DUS_like_FMN	420	1	1	90	136	1	0	1
Fusarium oxysporum f. sp. lycopersici 4287|426428	426428	Fungi	A0A0J9WHN6	DUS_like_FMN	429	1	1	99	82	1	0	1
Fusarium oxysporum NRRL 32931|660029	660029	Fungi	W9IYT6	DUS_like_FMN	429	1	1	99	135	1	0	1
Fusarium oxysporum f. sp. melonis 26406|1089452	1089452	Fungi	X0AM19	DUS_like_FMN	429	1	1	99	82	1	0	1
Fusarium oxysporum f. sp. conglutinans|100902	100902	Fungi	A0A8H6GY14	DUS_like_FMN	420	1	1	90	135	1	0	1
Cyphellophora europaea CBS 101466|1220924	1220924	Fungi	W2RLJ8	DUS_like_FMN	449	1	1	46	90	1	1	1
Rhinocladiella mackenziei CBS 650.93|1442369	1442369	Fungi	A0A0D2GXJ3	DUS_like_FMN	443	1	1	95	137	1	0	1
Fonsecaea pedrosoi CBS 271.37|1442368	1442368	Fungi	A0A0D2GXW8	DUS_like_FMN	428	1	1	27	127	1	0	1
Exophiala mesophila|212818	212818	Fungi	A0A0D1Z5I3	DUS_like_FMN	470	1	1	59	138	1	0	1
Exophiala dermatitidis NIH/UT8656|858893	858893	Fungi	H6BSV2	DUS_like_FMN	443	1	1	31	138	1	0	1
Exophiala oligosperma|215243	215243	Fungi	A0A0D2B8X6	DUS_like_FMN	473	1	1	125	155	1	0	1
Cladophialophora carrionii|86049	86049	Fungi	A0A1C1CJX8	DUS_like_FMN	424	1	1	27	117	1	0	1
Cladophialophora immunda|569365	569365	Fungi	A0A0D2CHU8	DUS_like_FMN	458	1	1	57	137	1	0	1
Cladophialophora bantiana CBS 173.52|1442370	1442370	Fungi	A0A0D2FZP9	DUS_like_FMN	428	1	1	27	134	1	0	1
Ascosphaera apis ARSEF 7405|392613	392613	Fungi	A0A168AZ68	DUS_like_FMN	503	1	1	139	177	1	0	1
Trichophyton rubrum CBS 118892|559305	559305	Fungi	F2T0R7	DUS_like_FMN	422	1	1	139	177	1	0	1
Paracoccidioides lutzii Pb01|502779	502779	Fungi	C1GQ61	DUS_like_FMN	484	1	1	99	114	1	0	0
Paracoccidioides brasiliensis Pb03|482561	482561	Fungi	C0S1V0	DUS_like_FMN	484	1	1	107	170	1	1	1
Paracoccidioides brasiliensis Pb18|502780	502780	Fungi	C1GA90	DUS_like_FMN	475	1	1	103	170	1	1	1
Uncinocarpus reesii 1704|336963	336963	Fungi	C4JZQ1	DUS_like_FMN	431	1	1	103	161	1	1	1
Coccidioides immitis H538.4|396776	396776	Fungi	A0A0J8UQJ3	DUS_like_FMN	451	1	1	89	136	1	0	1
Coccidioides immitis RS|246410	246410	Fungi	J3K3T4	DUS_like_FMN	461	1	1	33	155	1	0	1
Coccidioides posadasii str. Silveira|443226	443226	Fungi	E9DGG5	DUS_like_FMN	310	1	1	33	67	1	0	0
Coccidioides posadasii C735 delta SOWgp|222929	222929	Fungi	C5PB88	DUS_like_FMN	453	1	1	25	155	1	0	1
Coccidioides posadasii RMSCC 3488|454284	454284	Fungi	A0A0J6FJK0	DUS_like_FMN	453	1	1	25	154	1	0	1
Emergomyces pasteurianus Ep9510|1447872	1447872	Fungi	A0A1J9P6Z8	DUS_like_FMN	490	1	1	59	198	1	1	0
Blastomyces gilchristii SLH14081|559298	559298	Fungi	A0A179UC58	DUS_like_FMN	508	1	1	104	213	1	0	1
Blastomyces percursus|1658174	1658174	Fungi	A0A1J9Q7U1	DUS_like_FMN	505	1	1	60	212	1	0	1
Blastomyces dermatitidis ER-3|559297	559297	Fungi	A0A179TZD3	DUS_like_FMN	508	1	1	104	213	1	0	1
Blastomyces dermatitidis ATCC 26199|447095	447095	Fungi	T5BZH7	DUS_like_FMN	508	1	1	104	213	1	0	1
Histoplasma mississippiense nom. inval.|2059318	2059318	Fungi	A6R3V4	DUS_like_FMN	461	1	1	27	184	1	0	0
Histoplasma capsulatum G186AR|447093	447093	Fungi	C0NAJ4	DUS_like_FMN	495	1	1	61	184	1	1	1
Histoplasma capsulatum H143|544712	544712	Fungi	C6H4J3	DUS_like_FMN	495	1	1	101	184	1	1	0
Histoplasma capsulatum H88|544711	544711	Fungi	F0UJ53	DUS_like_FMN	495	1	1	101	184	1	1	0
Talaromyces stipitatus ATCC 10500|441959	441959	Fungi	B8MSD1	DUS_like_FMN	787	1	1	369	126	1	1	1
Talaromyces marneffei ATCC 18224|441960	441960	Fungi	B6QVQ9	DUS_like_FMN	446	1	1	29	115	1	0	1
Penicillium rubens Wisconsin 54-1255|500485	500485	Fungi	B6HDJ4	DUS_like_FMN	463	1	1	34	176	1	0	1
Penicilliopsis zonata CBS 506.65|1073090	1073090	Fungi	A0A1L9SN91	DUS_like_FMN	435	1	1	93	136	1	0	1
Aspergillus thermomutatus|41047	41047	Fungi	A0A397GDL5	DUS_like_FMN	443	1	1	98	166	1	0	1
Aspergillus glaucus CBS 516.65|1160497	1160497	Fungi	A0A1L9VKR8	DUS_like_FMN	427	1	1	26	141	1	0	1
Aspergillus tubingensis CBS 134.48|767770	767770	Fungi	A0A1L9N8W2	DUS_like_FMN	446	1	1	24	147	1	0	1
Aspergillus novofumigatus IBT 16806|1392255	1392255	Fungi	A0A2I1C2Q4	DUS_like_FMN	442	1	1	98	165	1	0	1
Aspergillus carbonarius ITEM 5010|602072	602072	Fungi	A0A1R3S090	DUS_like_FMN	447	1	1	24	149	1	0	1
Aspergillus lentulus|293939	293939	Fungi	A0A0S7DH09	DUS_like_FMN	443	1	1	98	166	1	0	1
Aspergillus brasiliensis CBS 101740|767769	767769	Fungi	A0A1L9UVB9	DUS_like_FMN	461	1	1	98	166	1	0	1
Aspergillus campestris IBT 28561|1392248	1392248	Fungi	A0A2I1DDV1	DUS_like_FMN	440	1	1	97	154	1	0	1
Aspergillus wentii DTO 134E9|1073089	1073089	Fungi	A0A1L9RGJ3	DUS_like_FMN	443	1	1	97	165	1	1	1
Aspergillus luchuensis IFO 4308|1033177	1033177	Fungi	G7XC46	DUS_like_FMN	446	1	1	24	147	1	0	1
Aspergillus luchuensis CBS 106.47|1137211	1137211	Fungi	A0A1M3TQK8	DUS_like_FMN	446	1	1	24	147	1	0	1
Aspergillus fumigatus A1163|451804	451804	Fungi	B0XYF2	DUS_like_FMN	443	1	1	98	166	1	0	1
Aspergillus clavatus NRRL 1|344612	344612	Fungi	A1CJV9	DUS_like_FMN	444	1	1	94	166	1	0	1
Aspergillus fischeri NRRL 181|331117	331117	Fungi	A1D7K9	DUS_like_FMN	443	1	1	98	166	1	0	1
Aspergillus versicolor CBS 583.65|1036611	1036611	Fungi	A0A1L9PFA6	DUS_like_FMN	441	1	1	22	154	1	0	1
Aspergillus nidulans FGSC A4|227321	227321	Fungi	A0A1U8QQ65	DUS_like_FMN	437	1	1	22	155	1	0	1
Aspergillus sydowii CBS 593.65|1036612	1036612	Fungi	A0A1L9TN20	DUS_like_FMN	449	1	1	30	159	1	0	1
Aspergillus ochraceoroseus IBT 24754|1392256	1392256	Fungi	A0A2T5LMN9	DUS_like_FMN	446	1	1	31	163	1	0	1
Aspergillus aculeatus ATCC 16872|690307	690307	Fungi	A0A1L9WT82	DUS_like_FMN	451	1	1	21	155	1	0	1
Aspergillus terreus NIH2624|341663	341663	Fungi	Q0CXF3	DUS_like_FMN	441	1	1	94	164	1	0	1
Aspergillus flavus|5059	5059	Fungi	A0A364M863	DUS_like_FMN	444	1	1	85	165	1	0	1
Aspergillus oryzae RIB40|510516	510516	Fungi	Q2UQ08	DUS_like_FMN	444	1	1	85	166	1	0	1
Aspergillus steynii IBT 23096|1392250	1392250	Fungi	A0A2I2GII1	DUS_like_FMN	439	1	1	94	140	1	0	1
Aspergillus niger CBS 513.88|425011	425011	Fungi	A2QES0	DUS_like_FMN	446	1	1	24	147	1	0	1
Aspergillus niger ATCC 13496|1353008	1353008	Fungi	A0A370C840	DUS_like_FMN	446	1	1	24	147	1	0	1
